# Supplementary material for: Zinc(ii) coordination compounds based on in situ generated 3-(5H-tetrazol)benzaldehyde with diverse modes: hydrothermal syntheses, crystal structures and photoluminescent properties
Source: Royal Society of Chemistry journal article supplement (doi:10.1039/c3ce27111k), 2013-01-01

## Electronic Supplementary Information (ESI)

### Zinc(II) coordination compounds based on *in situ* generated 3-(5H-tetrazol)benzaldehyde with diverse modes: hydrothermal syntheses, crystal structures and photoluminescent properties

Zhi-Fa Liu,<sup>ab</sup> Mei-Feng Wu,<sup>c</sup> Fa-Kun Zheng,<sup>\*a</sup> Shuai-Hua Wang,<sup>ab</sup> Ming-Jian Zhang,<sup>ab</sup> Jun Chen,<sup>ab</sup> Yu Xiao,<sup>ab</sup> Guo-Cong Guo,<sup>\*a</sup> and A-Qing Wu<sup>a</sup>

<sup>a</sup> State Key Laboratory of Structural Chemistry, Fujian Institute of Research on the Structure of Matter, Chinese Academy of Sciences, Fuzhou, Fujian 350002, P. R. China.

<sup>b</sup> Graduate school, University of Chinese Academy of Sciences, Beijing 100049, P. R. China.

<sup>c</sup> School of Environmental and Chemical Engineering, Nanchang Hangkong University, Nanchang, Jiangxi 330063, P. R. China.

Fax: (+86) 591-83714946; Tel:86-591-83704827; E-mail: [zfk@fjirsm.ac.cn](mailto:zfk@fjirsm.ac.cn)

**Table S1** The selected bond distances and angles for **1–4**.

| <b>1</b>              |             |                       |            |
|-----------------------|-------------|-----------------------|------------|
| Zn(1)-N(11)           | 1.992(3)    | Zn(1)-N(22)           | 2.020(2)   |
| Zn(2)-N(14)#2         | 1.998(2)    | Zn(2)-N(23)           | 2.015(2)   |
| N(11)-Zn(1)-N(11)#1   | 121.70(15)  | N(11)-Zn(1)-N(22)#1   | 104.51(10) |
| N(11)-Zn(1)-N(22)     | 111.84(10)  | N(22)#1-Zn(1)-N(22)   | 100.57(13) |
| N(14)#2-Zn(2)-N(14)#3 | 105.53(14)  | N(14)#2-Zn(2)-N(23)#1 | 113.62(10) |
| N(14)#2-Zn(2)-N(23)   | 111.03(10)  | N(23)#1-Zn(2)-N(23)   | 102.25(14) |
| <b>2</b>              |             |                       |            |
| Zn(1)-O(1)            | 1.992(2)    | Zn(1)-O(1)#1          | 2.018(2)   |
| Zn(1)-N(21)           | 2.204(4)    | Zn(1)-N(13)#1         | 2.168(3)   |
| Zn(1)-N(12)           | 2.247(3)    | Zn(1)-O(1)#2          | 2.540(2)   |
| O(1)-Zn(1)-O(1)#1     | 154.01 (11) | O(1)-Zn(1)-O(1)#2     | 77.74(9)   |
| N(21)-Zn(1)-N(12)     | 86.64(11)   | O(1)-Zn(1)-N(13)#1    | 108.60(9)  |
| O(1)#1-Zn(1)-N(13)#1  | 85.13(9)    | O(1)-Zn(1)-N(21)      | 98.99(13)  |
| O(1)#1-Zn(1)-N(21)    | 103.30(11)  | N(13)#1-Zn(1)-N(21)   | 88.97(11)  |
| O(1)-Zn(1)-N(12)      | 80.81(13)   | O(1)#1-Zn(1)-N(12)    | 87.26(9)   |

|                     |            |                      |           |
|---------------------|------------|----------------------|-----------|
| N(13)#1-Zn(1)-N(12) | 170.17(13) | N(12)-Zn(1)-O(1)#2   | 104.28(8) |
| O(1)#1-Zn(1)-O(1)#2 | 83.01(8)   | N(13)#1-Zn(1)-O(1)#2 | 80.97(8)  |
| N(21)-Zn(1)-O(1)#2  | 167.77(9)  |                      |           |

### 3

|                       |            |                     |            |
|-----------------------|------------|---------------------|------------|
| Zn(1)-N(61)           | 2.150(3)   | Zn(1)-N(61)#1       | 2.174(3)   |
| Zn(1)-N(51)#2         | 2.174(3)   | Zn(1)-N(32)         | 2.216(3)   |
| Zn(1)-N(52)           | 2.217(3)   | Zn(1)-N(13)         | 2.268(3)   |
| Zn(2)-N(23)           | 2.013(3)   | Zn(2)-N(33)         | 2.037(3)   |
| Zn(2)-N(12)           | 2.045(3)   | Zn(2)-N(42)         | 2.207(3)   |
| Zn(2)-N(41)#1         | 2.211 (3)  | N(61)-Zn(1)-N(51)#2 | 94.99(12)  |
| N(61)-Zn(1)-N(61)#1   | 78.87(13)  | N(61)-Zn(1)-N(51)#2 | 94.99(12)  |
| N(61)#1-Zn(1)-N(51)#2 | 93.54(12)  | N(61)-Zn(1)-N(32)   | 171.40(11) |
| N(61)#1-Zn(1)-N(32)   | 93.57(12)  | N(51)#2-Zn(1)-N(32) | 89.53(12)  |
| N(61)-Zn(1)-N(52)     | 91.14(12)  | N(61)#1-Zn(1)-N(52) | 94.14(12)  |
| N(51)#2-Zn(1)-N(52)   | 170.97(12) | N(32)-Zn(1)-N(52)   | 85.28(12)  |
| N(61)-Zn(1)-N(13)     | 93.33(12)  | N(61)#1-Zn(1)-N(13) | 172.20(12) |
| N(51)#2-Zn(1)-N(13)   | 86.92(12)  | N(32)-Zn(1)-N(13)   | 94.22(12)  |
| N(52)-Zn(1)-N(13)     | 86.10(12)  | N(23)-Zn(2)-N(33)   | 124.58(13) |
| N(23)-Zn(2)-N(12)     | 126.96(13) | N(33)-Zn(2)-N(12)   | 108.46(13) |
| N(23)-Zn(2)-N(42)     | 87.91(13)  | N(33)-Zn(2)-N(42)   | 91.85(12)  |
| N(12)-Zn(2)-N(42)     | 90.98(13)  | N(23)-Zn(2)-N(41)#2 | 92.39(13)  |
| N(33)-Zn(2)-N(41)#2   | 88.51(12)  | N(12)-Zn(2)-N(41)#2 | 88.33(12)  |
| N(42)-Zn(2)-N(41)#2   | 179.29(12) |                     |            |

### 4

|                     |            |                     |            |
|---------------------|------------|---------------------|------------|
| Zn(1)-N(23)#1       | 2.059(2)   | Zn(1)-N(13)         | 2.080(3)   |
| Zn(1)-N(22)         | 2.136(2)   | Zn(1)-N(31)         | 2.134(2)   |
| Zn(1)-N(32)         | 2.163(3)   | N(31)-Zn(1)-N(32)   | 77.32(10)  |
| N(13)-Zn(1)-N(22)   | 88.61(10)  | N(23)#1-Zn(1)-N(31) | 101.12(9)  |
| N(13)-Zn(1)-N(31)   | 99.36(10)  | N(22)-Zn(1)-N(31)   | 152.94(10) |
| N(23)#1-Zn(1)-N(32) | 102.29(10) | N(13)-Zn(1)-N(32)   | 160.88(11) |
| N(22)-Zn(1)-N(32)   | 86.70(10)  | N(23)#1-Zn(1)-N(13) | 96.83(10)  |
| N(23)#1-Zn(1)-N(22) | 103.56(9)  |                     |            |

Symmetry codes for **1**: (#1)  $1 - x, y, -1.5 - z$ ; (#2)  $0.5 + x, 0.5 + y, -1.5 - z$ ; (#3)  $0.5 - x, 0.5 + y, z$ ; for **2**: (#1)  $x, 2 - y, 0.5 + z$ ; (#2)  $-x, y, 0.5 - z$ ; for **3**: (#1)  $-x, 1 - y, -z$ ; (#2)  $1 + x, y, z$ ; for **4**: (#1)  $1 - x, 1 - y, 1 - z$ .

**Table S2** Hydrogen-bonding geometries for **1–4**.

| D-H...A            | D-H/Å     | H...A/Å   | D...A/Å   | ∠D-H...A/° |
|--------------------|-----------|-----------|-----------|------------|
| <b>1</b>           |           |           |           |            |
| O1W-H1WB...O11     | 0.85(2)   | 2.58(3)   | 3.193(10) | 130(4)     |
| C15-H15A...O1W_\$1 | 0.93      | 2.57      | 3.290(8)  | 134        |
| <b>2</b>           |           |           |           |            |
| O1-H1...N11_\$1    | 0.76(5)   | 2.56(5)   | 3.105(3)  | 130(4)     |
| O1W-H1WA...N14     | 0.991(12) | 1.925(12) | 2.905(3)  | 169.1(10)  |
| C17-H17A...O1W_\$2 | 0.93      | 2.48      | 3.343(4)  | 154        |
| C24-H24A...O11_\$3 | 0.93      | 2.45      | 3.145(6)  | 132        |
| C25-H25A...N12     | 0.93      | 2.53      | 3.063(5)  | 117        |
| <b>3</b>           |           |           |           |            |
| C41-H41A...N22_\$1 | 0.93      | 2.59      | 3.196(6)  | 124        |
| C45-H45A...N12_\$2 | 0.93      | 2.62      | 3.125(5)  | 115        |
| C47-H47A...O11_\$3 | 0.93      | 2.57      | 3.155(6)  | 121        |
| C48-H48A...O11_\$3 | 0.93      | 2.52      | 3.141(6)  | 124        |
| C48-H48A...N33     | 0.93      | 2.62      | 3.165(6)  | 118        |
| <b>4</b>           |           |           |           |            |
| C312-H31C...N22    | 0.93      | 2.61      | 3.119(5)  | 115        |
| C31-H31D...14      | 0.93      | 2.44      | 3.222(6)  | 141        |
| C32-H32A...O11_\$1 | 0.93      | 2.56      | 3.372(7)  | 146        |
| C37-H37A...N24_\$1 | 0.93      | 2.57      | 3.457(5)  | 159        |

Symmetry code for **1**: \$1 1 - x, -1 - y, -2 - z; for **2**: \$1 x, 2 - y, -0.5 + z; \$2 x, y, 1 + z; \$3 0.5 - x, 2.5 - y, 1 - z; for **3**: \$1 -1 - x, 1 - y, -1 - z; \$2 -1 + x, y, z; \$3 x, 1 + y, z; for **4**: \$1 x, 1 + y, z.

**Fig. S1** IR spectra of **1–4**.

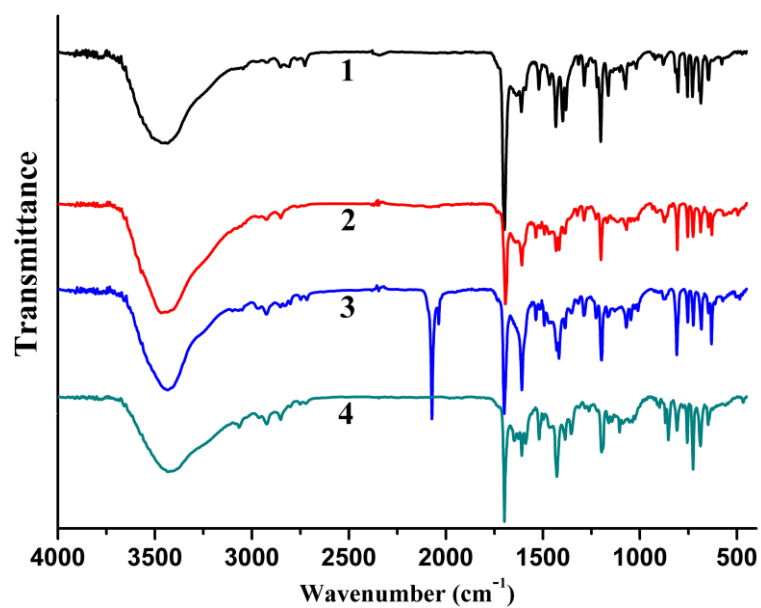

**Fig. S2** Powdered X-ray diffraction (PXRD) patterns of **1–4**. The black and red lines represent simulated and experimental results, respectively.

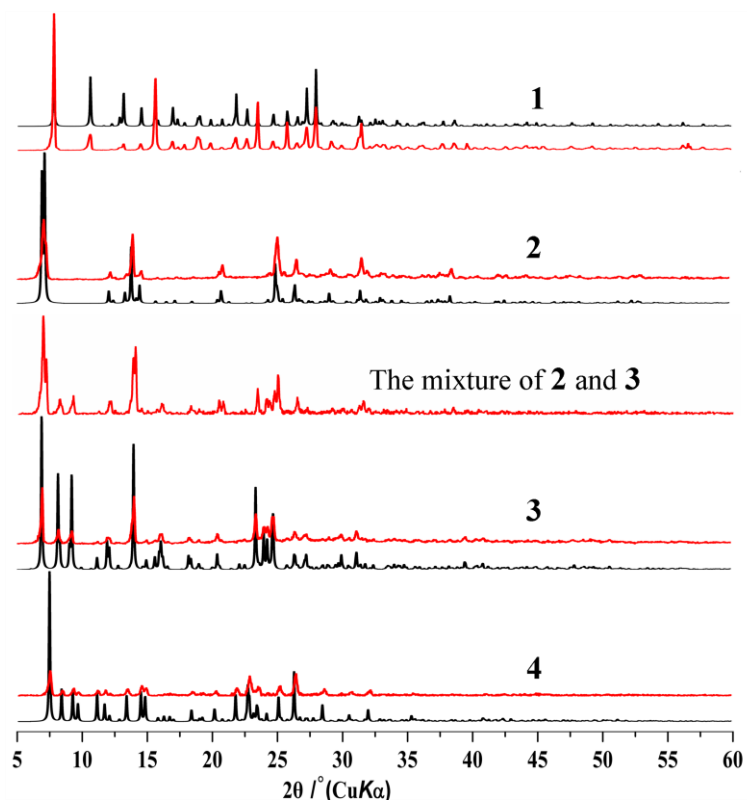

**Fig. S3** Schematic representation of 2-D to 3-D supramolecular architecture *via* hydrogen bonds in **1**.

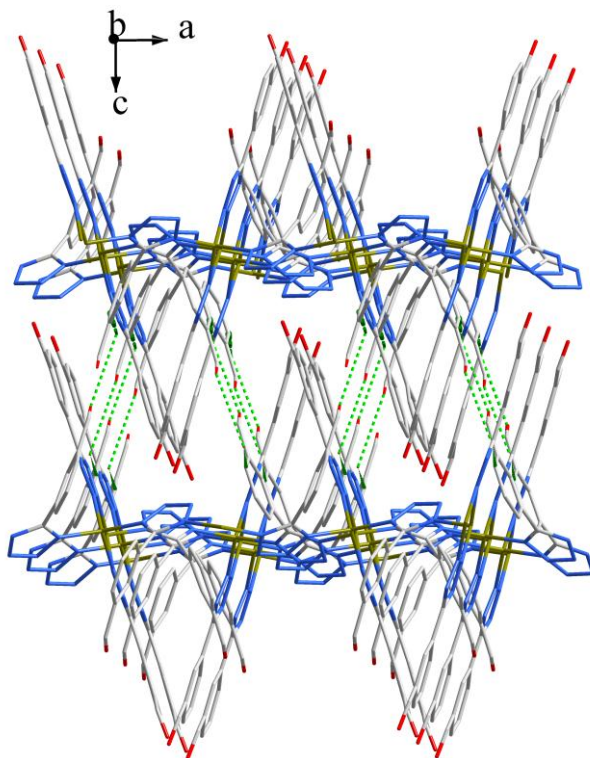

**Fig. S4** Schematic representation of 2-D to 3-D supramolecular architecture *via* hydrogen bonds in **2**.

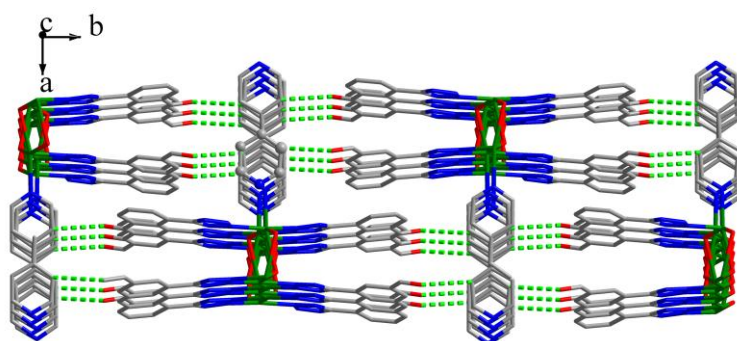

**Fig. S5** Schematic representation of 1-D to 3-D supramolecular architecture *via* hydrogen bonds in **3**.

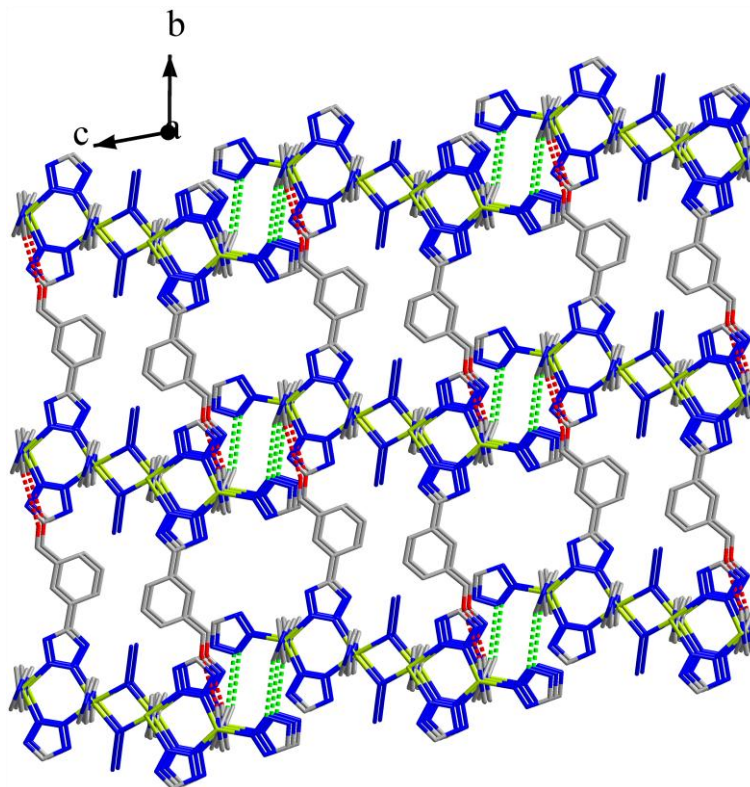

**Fig. S6** Schematic representation of 0-D to 1-D supramolecular architecture *via* hydrogen bonds in **4**.

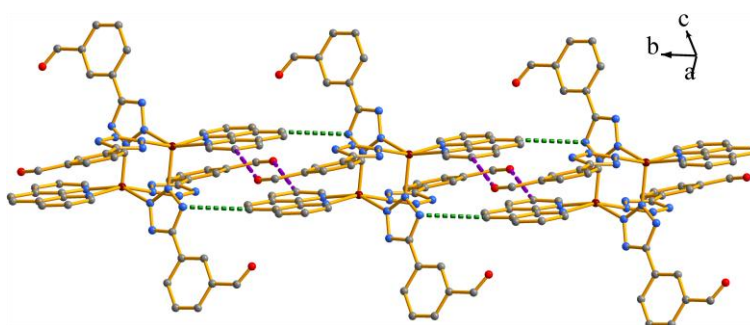

**Fig. S7** The excitation spectra of **1–4** and free ligand 3-Htzbd.

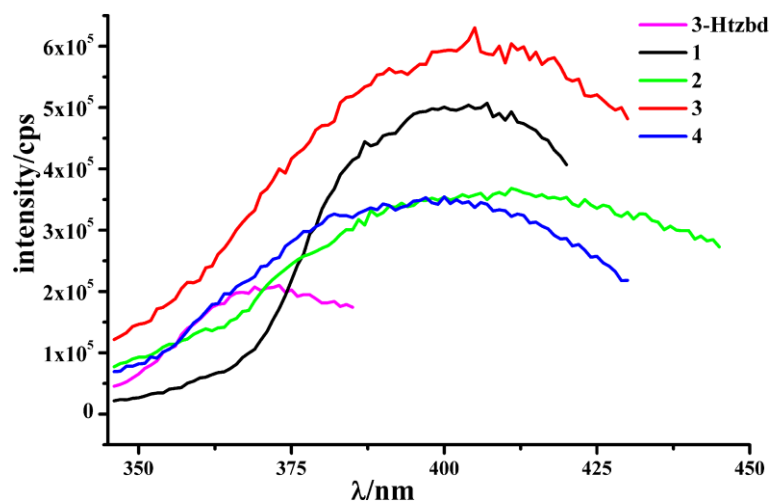

**Fig. S8** Luminescent decay and IRF (instrument response function) curves of **1–4**.

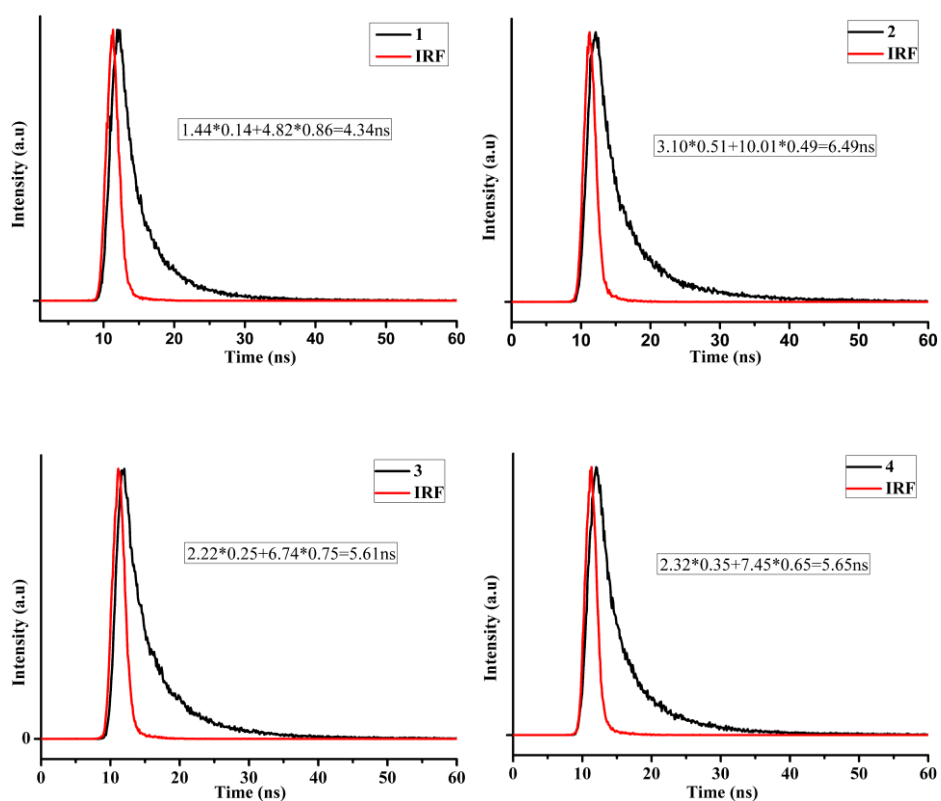

**Fig. S9** Reflectance diffusion spectra of **1–4**.

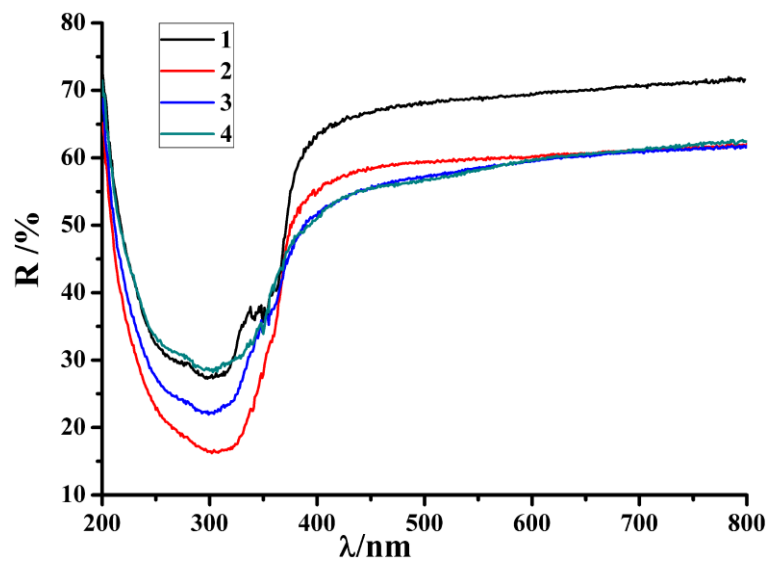

Supplement: c3ce27111k.pdf [file c3ce27111k.pdf]
